# Supplementary material for: Synthesis and structures of a pentanuclear Al(iii) phosphonate cage, an In(iii) phosphonate polymer, and coordination compounds of the corresponding phosphonate ester with GaI3 and InCl3
Source: Royal Society of Chemistry journal article supplement (doi:10.1039/c2dt31280h), 2012-01-01

# Synthesis and structures of a pentanuclear Al(III) phosphonate cage, an In(III) phosphonate polymer, and coordination compounds of the corresponding phosphonate ester with GaI<sub>3</sub> and InCl<sub>3</sub>

Anne F. Richards\*<sup>a</sup> and Christine M. Beavers<sup>b</sup>

Supporting Information

<sup>27</sup>Al MAS-NMR of complex 1 (full spectrum).

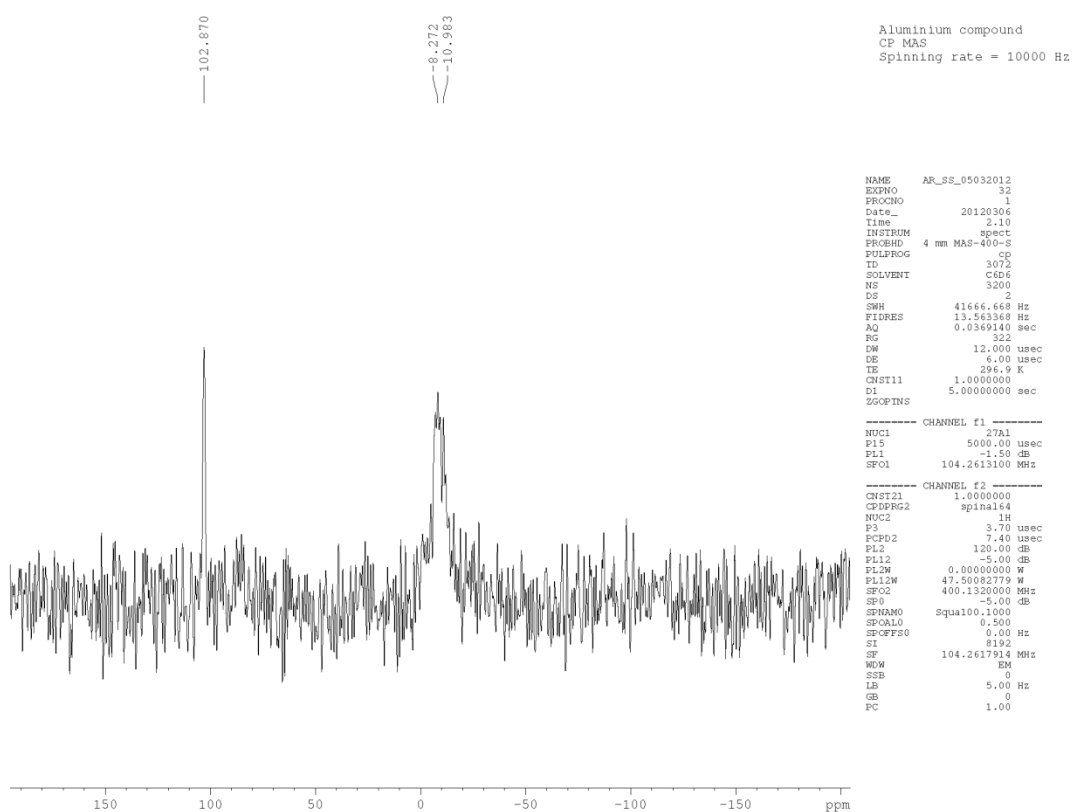

### <sup>31</sup>P MAS-NMR of complex 1.

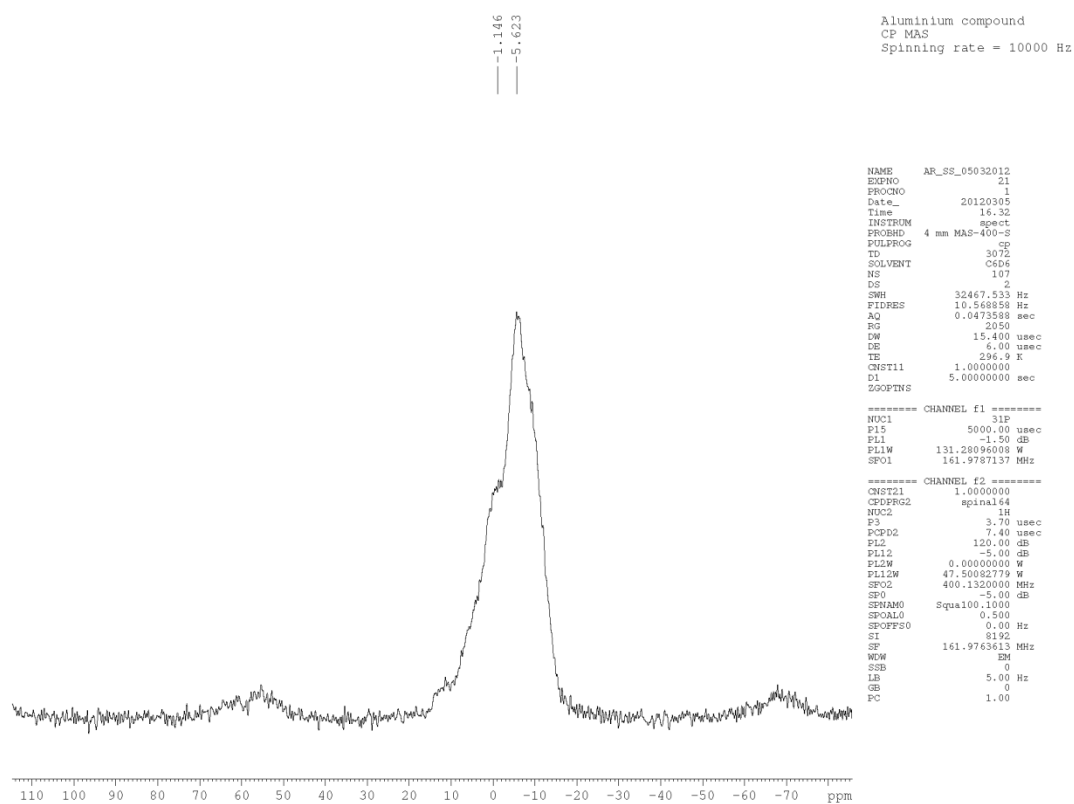

### <sup>31</sup>P MAS NMR Data of 2

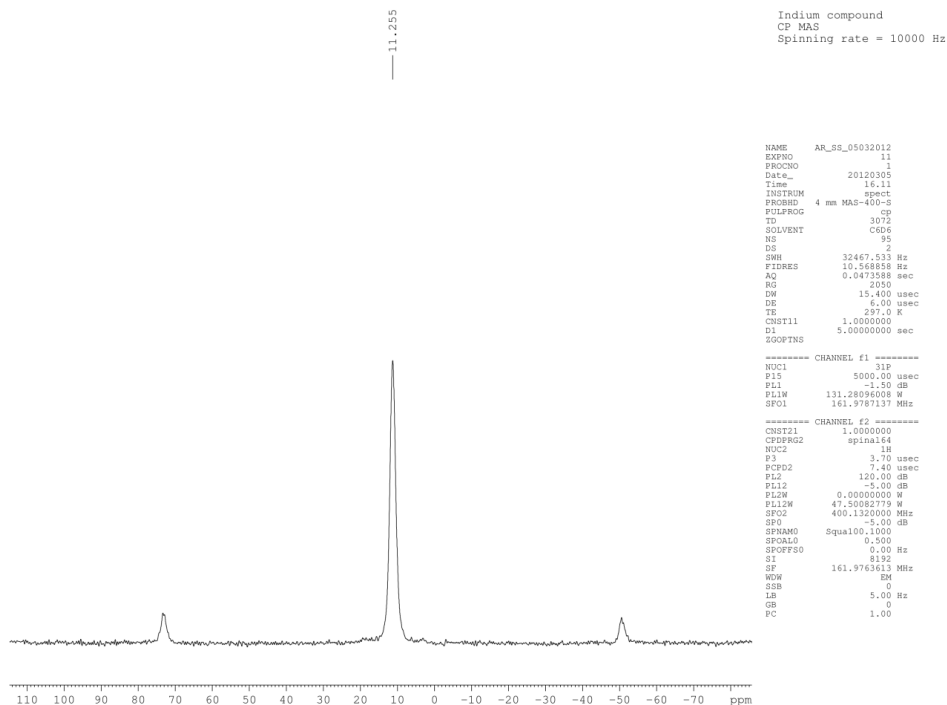

### TGA Data for Complex 2

The thermal stability of 2 was examined by thermogravimetric analysis (TGA) in a N<sub>2</sub> atmosphere from 25 to 700 °C. The initial weight loss of 8.2 % between 70 - 150 °C is due to the loss of water molecules (calc. 8.8 %). The total weight loss of 47.6%, corresponds to loss of the organics, water and ions (calc. 44.9 %) . Final residues were not characterized.

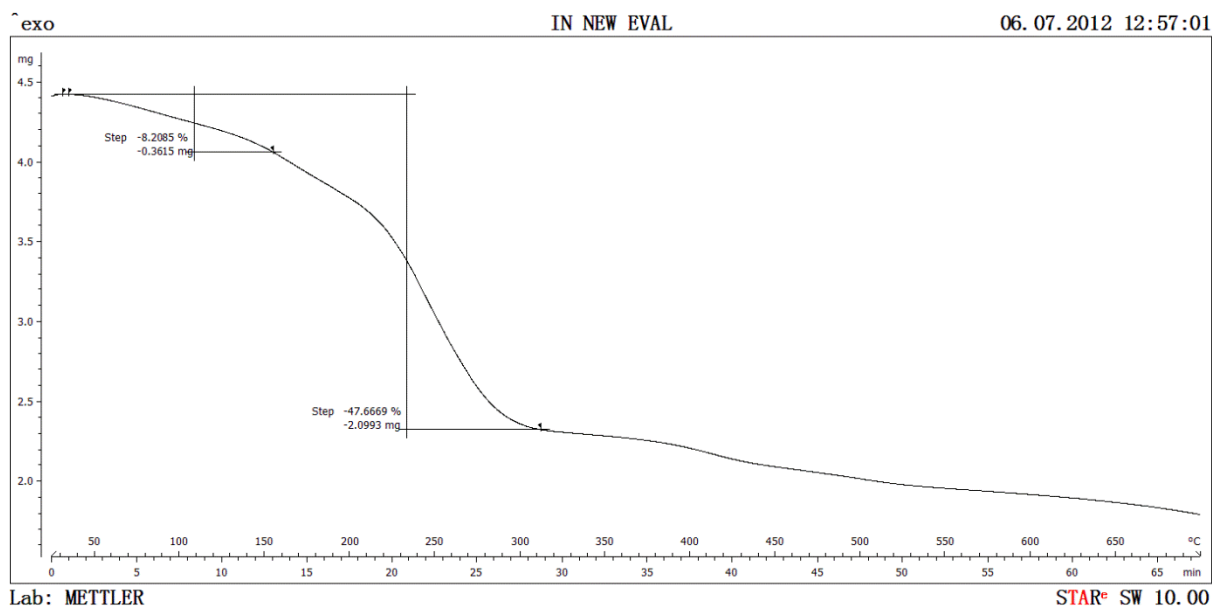

Supplement: c2dt31280h.pdf [file c2dt31280h.pdf]
